# Supplementary material for: In vitro and in vivo characterization of erythrosin B and derivatives against Zika virus
Source: PubMed Central journal article supplement — Acta Pharm Sin B. 2021 Oct 22;12(4):1662–70. doi: 10.1016/j.apsb.2021.10.017 (PMC9279632; doi:10.1016/j.apsb.2021.10.017), 2021-10-22
Supplement: mmc1.pdf [file mmc1.pdf]

## Supporting Information for

### Original article

#### ***In vitro* and *in vivo* characterization of erythrosin B and derivatives against Zika virus**

Zhong Li<sup>a,b,†</sup>, Jimin Xu<sup>c,†</sup>, Yuekun Lang<sup>b,†</sup>, Xiangmeng Wu<sup>a</sup>, Saiyang Hu<sup>b</sup>, Subodh Samrat<sup>a,b</sup>, Anil Tharappel<sup>a,b</sup>, David Butler<sup>d</sup>, Yongcheng Song<sup>e</sup>, Qing-Yu Zhang<sup>a</sup>, Jia Zhou<sup>c</sup>, Hongmin Li<sup>a,b,\*</sup>

<sup>a</sup>*Department of Pharmacology and Toxicology, College of Pharmacy, Tucson, AZ 85721-0207, USA*

<sup>b</sup>*Wadsworth Center, New York State Department of Health, Albany, NY 12208, USA*

<sup>c</sup>*Chemical Biology Program, Department of Pharmacology and Toxicology, University of Texas Medical Branch, Galveston, Texas 77555, USA*

<sup>d</sup>*The Neural Stem Cell Institute, Rensselaer, NY 12144, USA*

<sup>e</sup>*Department of Pharmacology and Chemical Biology, Baylor College of Medicine, Houston, TX 77030, USA*

<sup>†</sup>These authors made equal contributions to this work.

\*Corresponding author. Tel.: +1 520 621 5728.

E-mail address: [hli1@pharmacy.arizona.edu](mailto:hli1@pharmacy.arizona.edu) (Hongmin Li).

Received 23 August 2021; received in revised form 30 September 2021; accepted 4 October 2021

|       | 1          | 11          | 20 * *     | 30          | 40 *       | 50 *       |
|-------|------------|-------------|------------|-------------|------------|------------|
| DENV2 | AGVLWDVPSP | PPVGKAE-LE  | DGAYRIKQKG | IL-GYSQIGA  | GVYKEGTFHT | MWHVTRGAVL |
| DENV3 | SGVLWDVPSP | PETQKAE-LE  | EGVYRIKQQG | IF-GKTQVGV  | GVQKEGVFHT | MWHVTRGAVL |
| DENV1 | SGVLWDTSP  | PEVERAV-LD  | NGIYRILQRG | LL-GRSQVGV  | GVFQEGVFHT | MWHVTRGAVL |
| DENV4 | SGALWDVPSP | AAAQKAT-LT  | EGVYRIMQRG | LF-GKTQVGV  | GIHMEGVFHT | MWHVTRGSVI |
| ZIKV  | SGALWDVPAP | KEVKKGE-TT  | DGVYRVMTRR | LL-GSTQVGV  | GVMQEGVFHT | MWHVTKGAAL |
| WNV   | GGVLWDTSP  | KEYKKGD-TT  | TGVYRIMTRG | LL-GSYQAGA  | GVMVEGVFHT | LWHTTKGAAL |
| JEV   | GGVFWDTPSP | KPCSKGD-TT  | TGVYRIMARG | IL-GTYQAGV  | GVMYENVFHT | LWHTTRGAAI |
| YFV   | GDVLWDIPTP | KIIEECEHLE  | DGIYGIFQST | FL-GASQRGV  | GVAQGGVFHT | MWHVTRGAFL |
| SLEV  | GGALWDVPSP | KVYPKCE-TK  | PGIYRIMTRG | IL-GTFQAGV  | GVMHEGVFHT | MWHATEGAVL |
| THV   | GGVLWDVPSP | KTFQKPE-LK  | PGVYRVMSRG | VF-GSFQAGV  | GVMYEGVFHT | MWHVTQGAAL |
| ILHV  | GGVMWDVPAP | KQFGKTE-LK  | PGVYRVMTMG | IL-GRYQSGV  | GVMWDGVFHT | MWHVTQGAAL |
| ROCV  | GGVLWDLAP  | KQMGSRD-MK  | PGVYRVMTSG | VL-GSYQSGV  | GVMYDGVFHT | MWHVTQGAAL |
| MVEV  | GGVFWDTPSP | KVYPKGD-TT  | PGVYRIMARG | IL-GRYQAGV  | GVMHEGVFHT | LWHTTRGAAI |
| ALFV  | GGVFWDTPSP | KTYAKGD-TT  | PGVYRIMAKG | LL-GRYQAGV  | GIMYEGVFHT | LWHTTRGAAI |
| YAOV  | GGVLWDTAP  | REYKKGD-TT  | TGVYRIMTHG | IL-GKYQAGV  | GVMYEGVFHT | LWHTTRGAAL |
| KUNV  | GGVLWDTSP  | KEYKKGD-TT  | TGVYRIMTRG | LL-GSYQAGA  | GVMVEGVFHT | LWHTTKGAAL |
| KOUV  | GGVLWDTSP  | KEYKKGD-TT  | TGVYRIMTRG | LL-GNYQAGA  | GVMVEGVFHT | LWHTTKGAAL |
| CACV  | GGILWDTSP  | QEFRKGD-TT  | TGVYRIMARG | VL-GSFQAGA  | GVMVEGVFHT | LWHTTKGSAL |
| USUV  | GGVFWDTPAP | RTYPKGD-TS  | PGVYRIMSRY | IL-GTYQAGV  | GVMYEGVLHT | LWHTTRGAAI |
| TEMV  | GGVIWDVPAP | KERKKAEE-VG | NGVFRIMARG | LL-GKYQAGV  | GVMHEGVFHT | MWHVTNGAVI |
| BAIV  | GGVIWDVPAP | KERKRAE-VG  | NGVFRIMARG | LL-GKYQAGV  | GVMHEGVFHT | MWHVTNGAVI |
| SITV  | GGVIWDVPAP | KERKKVE-VG  | NGVFRIMARG | LL-GKYQAGV  | GVMHEGVFHT | MWHVTNGAVI |
| BAGV  | SGAIWDVPAP | KERKRAE-LS  | TGVFRIMARG | IL-GKYQAGV  | GVMFDGVFHT | MWHVTNGATI |
| NTAV  | SGAIWDVPAP | KERRKAE-IS  | TGVFRIMARG | IF-GKYQAGV  | GVMYEGVFHT | MWHVTNGATI |
| SPOV  | SGAMWDIPSP | REVKKGE-TT  | AGVYRIMTRK | LL-GSTQVGA  | GVMHEGVFHT | MWHVTKGSAL |
| AROV  | AGALWDIPAP | REVKKGS-TE  | NGVYRILANR | LF-GKTQVGV  | GVMHEGVFHT | MWHVTRGAAL |
| BUSV  | AGALWDIPAP | REVKKGS-TE  | NGVYRILANR | LF-GKTQVGV  | GVMHEGVFHT | MWHVTRGAAL |
| NARV  | AGALWDIPAP | KEAKKGS-TE  | NGVYRIFANR | LF-GRVQVGV  | GVMQDGVFHT | MWHVTRGAAL |
| IGUV  | AGALWDIPSP | TVKKPAS-TE  | PGVYRIMAAR | LI-GSSQIGV  | GVMYEGVFHT | MWHVTRGAAL |
| DONV  | GGVLWDIPHP | STSKAGD-TE  | TGVYRIMSKR | LF-GATQIGV  | GVMYESVFHT | MWHVTRGASL |
| MMV   | GGVLWDIPSP | PTKNGGD-TE  | TGVYRIMSKR | LF-GSSQVGV  | GVMFENVFHT | MWHVTRGASL |
| LPKV  | GGILWDIPSP | KVTPAGG-TE  | TGVYRIMSRK | IL-GSAQVGV  | GVMYENVFHT | MWHITRGASV |
| GUAV  | GGILWDIPSP | KASPAGG-TE  | TGVYRIMSKK | IL-GSTQIGV  | GVMFENVFHT | MWHITRGASV |
| ILOV  | GGVLWDVPSP | AHKTSNPMTE  | EGVYRVMSKR | II-GSSQVGV  | GIMYENTFHT | MWHVTRGASL |
| CHAV  | GTVLWDIPHP | IASSAPS-VE  | DGCYRVMSRR | LI-GSTQVGV  | GVMKDSVFHT | MWHVTRGASL |
| PSOV  | GVILWDLPHP | APVGDAE-VE  | DGVYRVMSQR | LL-GTQQIGV  | GVMKEGTFHT | MWHVTRGASL |
| KEDV  | SGALWDMPP  | KPTPPAI-LG  | DGVYRIMSKK | LL-GPSQLGV  | GVMTQGVFHT | MWHVTRGCTI |
| POWV  | DLVFSGQLPD | QGEKRSFDIK  | EGVYRIYAPG | LFWGYRQIGV  | GYGTKGVLHT | MWHVTRGAAL |
| LANV  | DLVFSGCSEG | RSDSRPLDVK  | NGVYRIYTPG | LLWGQRQIGV  | GYGAKGVLHT | MWHVTRGAAL |
| TBEV  | DLVFSGQGG  | ERGDRPFVVK  | DGVYRIFSPG | LFWGQNQVGV  | GYGSKGVLHT | MWHVTRGAAL |
| LOUV  | DLVYSGQGG  | ERGDRPFVVK  | DGVYRIFSPG | LFWGQRQVGV  | GYGHKGVLHT | MWHVTRGAAL |
| OHFV  | DLVFSGQSGS | ERGSQPFVVR  | DGVYRILSPG | LLWGHQRQVGV | GFGSKGVLHT | MWHVTRGAAI |
| KFDV  | ELVFSGQETR | TERNRPFVVK  | DGAYRIYSPG | LLWGHQRQIGV | GYGAKGVLHT | MWHVTRGAAL |
| AHFV  | ELVFSGQGTR | TERNRPFVVK  | DGAYRIYSPG | LLWGHQRQIGV | GYGAKGVLHT | MWHVTRGAAL |

**Figure S1** Alignment of the NS3 sequences at the EB-binding site of 44 representative flaviviruses. Residues are colored according to sequence conservation: Red, >90%; blue, >50%; black, <50%. The NS3 residues in contact erythrosin B are shaded, with essential residues for erythrosin B binding marked with \*. Mosquito-borne viruses are shaded with cyan color; tick-borne viruses are shaded with green color. Virus Abbreviations: dengue virus (DENV); Zika virus (ZIKV); West Nile virus (WNV); Japanese encephalitis virus (JEV); yellow fever virus (YFV); St. Louis encephalitis virus (SLEV); T'Ho virus (THV); Ilheus virus (ILHV); Rocio virus (ROCV); Murray

Valley encephalitis virus (MVEV); Alfuy virus (ALFV); Yaounde virus (YAOV); Kunjin virus (KUNV); Koutango virus (KOUV); Cacipacore virus (CACV); Usutu virus (USUV); Tembusu virus (TEMV); Baiyangdian virus (BAIV); Sitiawan virus (SITV); Bagaza virus (BAGV); Ntaya virus (NTAV); Spondweni virus (SPOV); Aroa virus (AROV); Bussuquara virus (BUSV); Naranjal virus (NARV); Iguape virus (IGUV); Donggang virus (DONV); Marisma mosquito virus (MMV); Long Pine Key virus (LPKV); Guapiacu virus (GUAV); Ilomantsi virus (ILOV); Chaoyang virus (CHAV); Psorophora flavivirus (PSOV); Kedougou virus (KEDV); Powassan virus (POWV); Langat virus (LANV); Tick-borne encephalitis virus (TBEV); Louping ill virus (LOUV); Omsk hemorrhagic fever virus (OHFV); Kyasanur Forest disease virus (KFDV); Alkhumra hemorrhagic fever virus (AHFV).

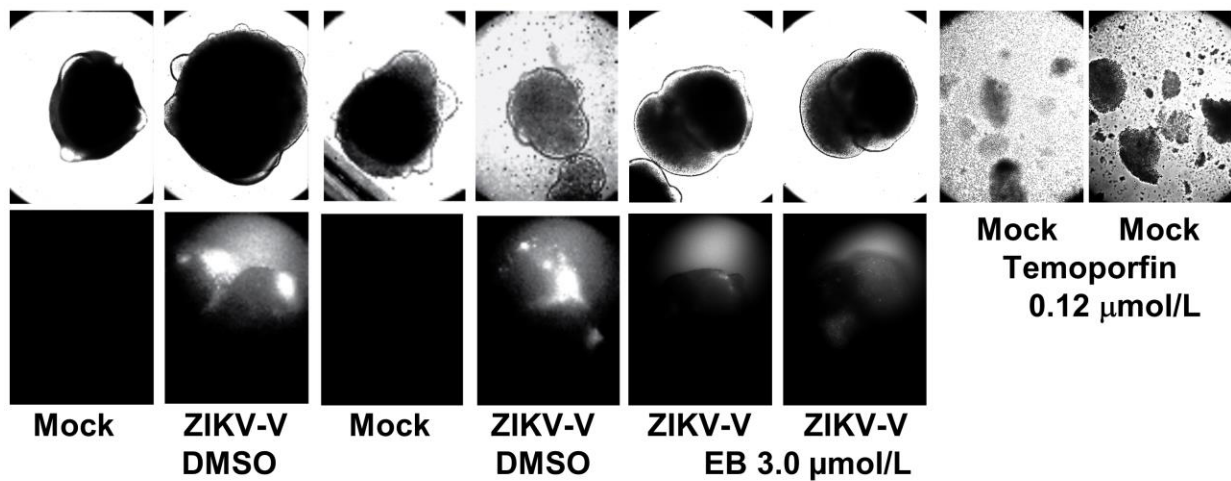

Published previously, refs<sup>35, 57</sup>

**Figure S2**, ZIKV organoid infected with ZIKV-Venus (ZIKV-V)<sup>35, 37</sup>. The 3D organoids were infected with PBS (Mock), or ZIKV untreated (DMSO), or ZIKV treated with EB (3.0  $\mu\text{mol/L}$ ), or Mock treated with Temoporfin (0.12  $\mu\text{mol/L}$ ). Upper panel, bright field image of intact organoids. Lower panel, Venus fluorescence image (excitation 515 nm, emission 528 nm) of the intact 3D organoids.
